# Supplementary material
Source: Springer Nature journal article supplement (https://www.springermedizin.de/resource/supplementary/12885_2014_4700_MOESM1_ESM.pdf/9467066)
Supplement: MOESM1 [file 9467066]

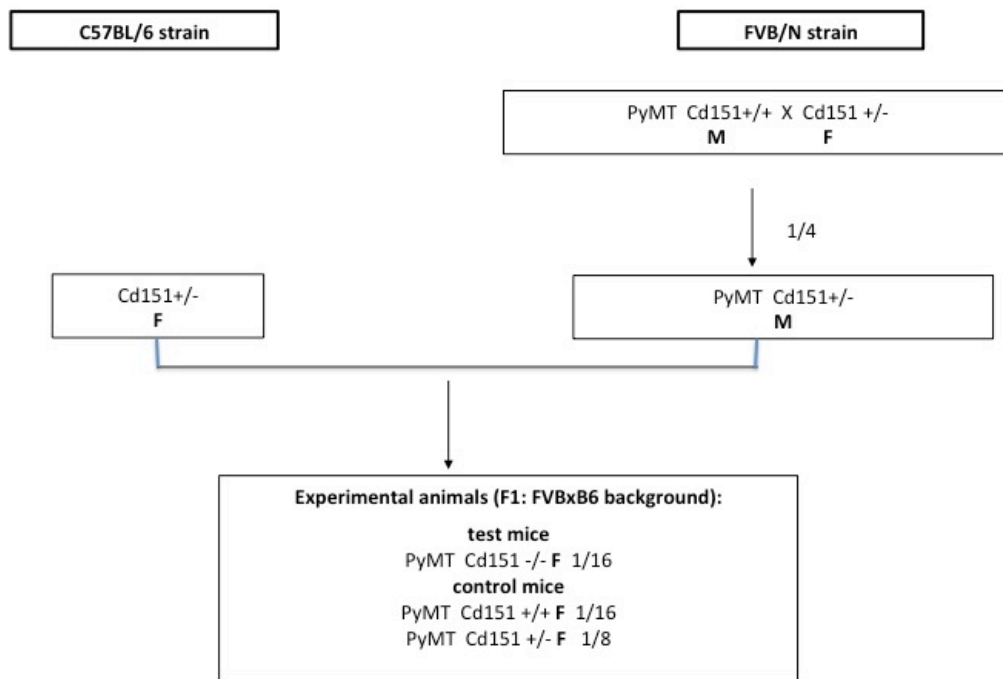

**Additional file 1: Supplementary Figure 1. Diagram representing the breeding protocol used to generate the F1 (FVBxB6) PyMT *Cd151*<sup>+/+</sup> and *Cd151*<sup>-/-</sup> experimental animals.**
